# Supplementary material
Source: publisher figshare collection journal article supplement (https://acs.figshare.com/ndownloader/files/12869069)
Supplement: Supplementary file 1 [file 12869069]

# Supporting Information

## Photoinduced Enhanced Raman from Lithium Niobate on Insulator Template

*Rusul M. Al-Shammari,<sup>1,2</sup> Mohammad Amin Baghban,<sup>3</sup> Nebras Al-attar,<sup>4,5</sup> Aoife Gowen,<sup>4</sup> Katia Gallo,<sup>3</sup> James H. Rice<sup>1</sup> and Brian J. Rodriguez,<sup>1,2,\*</sup>*

<sup>1</sup>School of Physics, University College Dublin, Belfield, Dublin 4, Ireland

<sup>2</sup>Conway Institute of Biomolecular and Biomedical Research, University College Dublin, Belfield, Dublin 4, Ireland

<sup>3</sup>Department of Applied Physics, KTH – Royal Institute of Technology, 106 91 Stockholm, Sweden

<sup>4</sup>School of Biosystems and Food Engineering, University College Dublin, Belfield, Dublin 4, Ireland

<sup>5</sup>Laser and Optoelectronics Engineering Department, University of Technology, 10066 Baghdad, Iraq

\*brian.rodriguez@ucd.ie

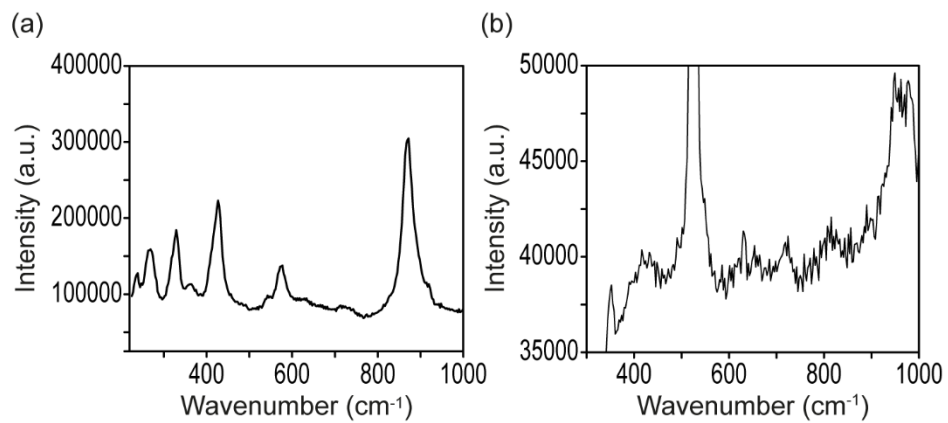

**Figure S1.** Raman spectra from (a) uniform x-cut LN-Ag-4ABT and (b) x-cut LNOI-Ag-4ABT. The full data range for (b) can be seen in Figure 1c(i).

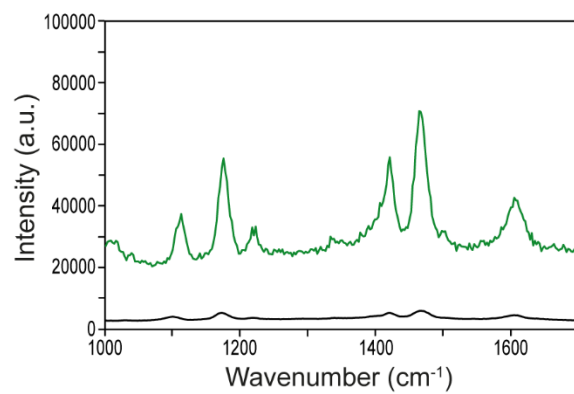

**Figure S2.** Raman spectra of 4ABT on x-cut LNOI (green) and on uniform x-cut LN (black) in the absence of Ag nanoparticles.

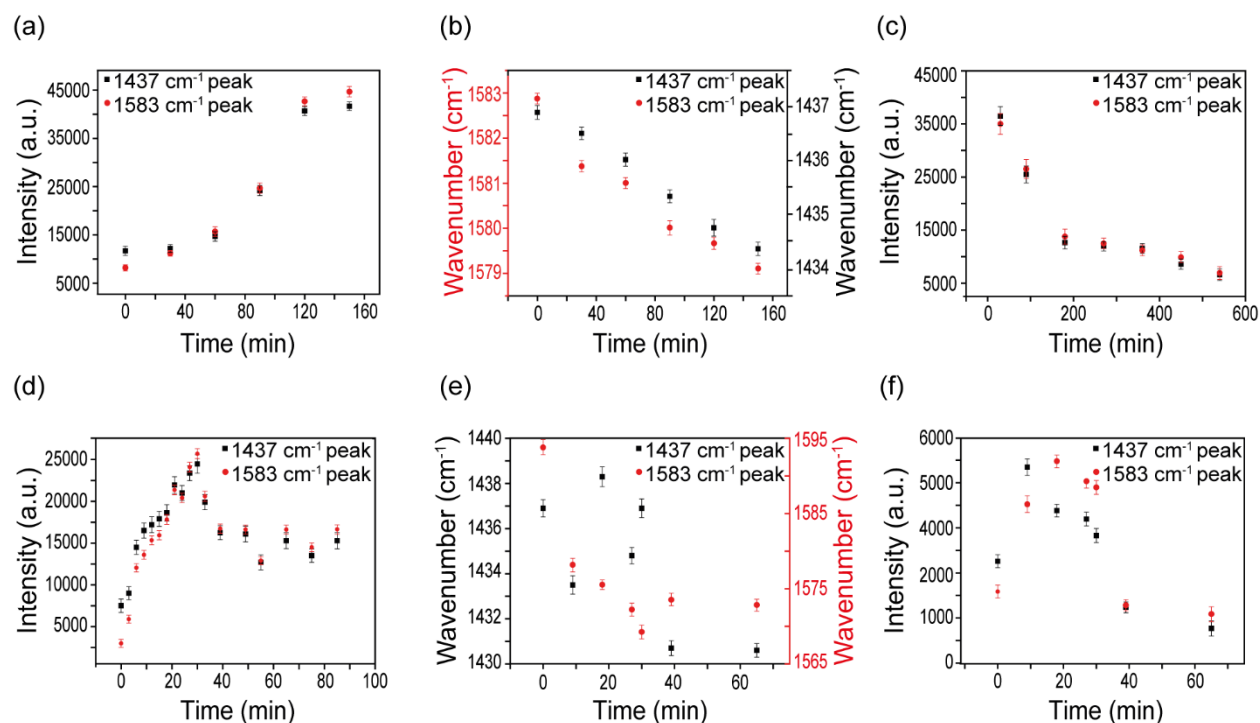

**Figure S3.** (a) Intensity and (b) shift of the 1583 cm<sup>-1</sup> and 1437 cm<sup>-1</sup> bands with increasing irradiation time for x-cut LNOI-Ag-4ABT (substrate irradiation). (c) Relaxation of the intensity of the 1583 cm<sup>-1</sup> and 1437 cm<sup>-1</sup> bands following 150 minutes of substrate irradiation for x-cut LNOI-Ag-4ABT. (d) Intensity and (e) shift of the 1583 cm<sup>-1</sup> and 1437 cm<sup>-1</sup> bands with increasing irradiation time for x-cut LNOI-Ag-4ABT (sample irradiation). (f) Background-subtracted intensity of the 1583 cm<sup>-1</sup> and 1437 cm<sup>-1</sup> bands with increasing sample irradiation time for x-cut LNOI-Ag-4ABT.

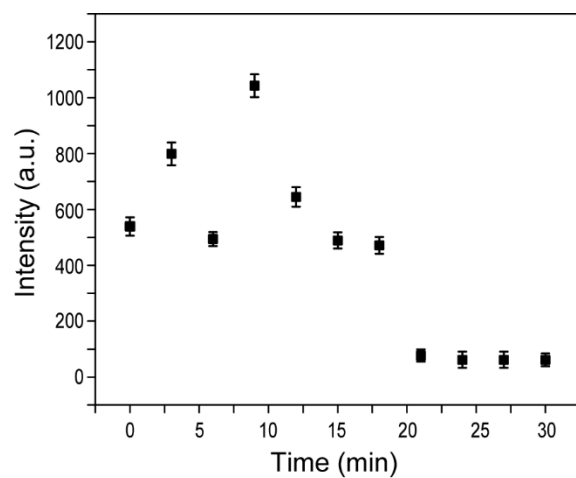

**Figure S4.** Background-subtracted intensity for the 1583 cm<sup>-1</sup> band for sample irradiation for x-cut LNOI-4ABT without Ag nanoparticles.

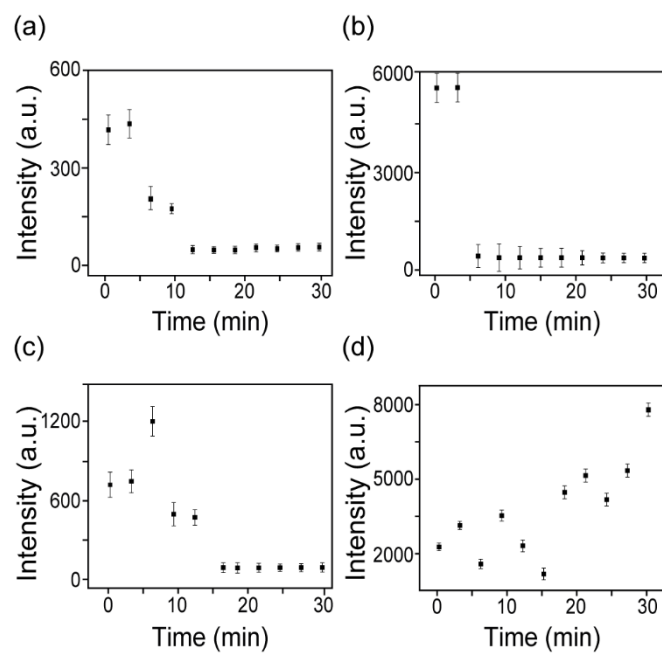

**Figure S5.** Background-subtracted intensity for the 1583 cm<sup>-1</sup> band for sample irradiation for (a) uniform x-cut LN-Ag-4ABT, (b) -z PPELN-Ag-4ABT, (c) unetched y-cut LNOI-Ag-4ABT, and (d) etched x-cut LNOI-Ag-4ABT.

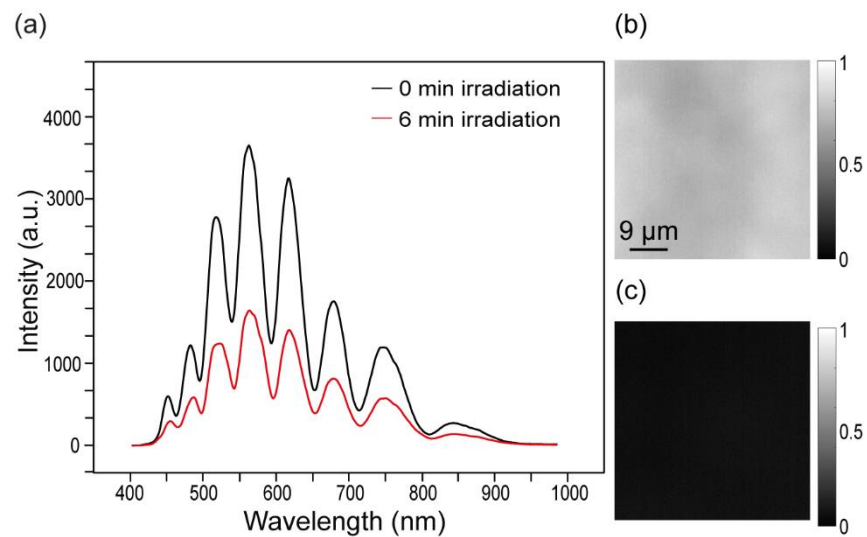

**Figure S6.** (a) Reflectance intensity recorded for unetched y-cut LNOI-Ag before and after 6 minutes of UV irradiation. Normalized hyperspectral images (b) before and (c) after 6 minutes of UV irradiation.

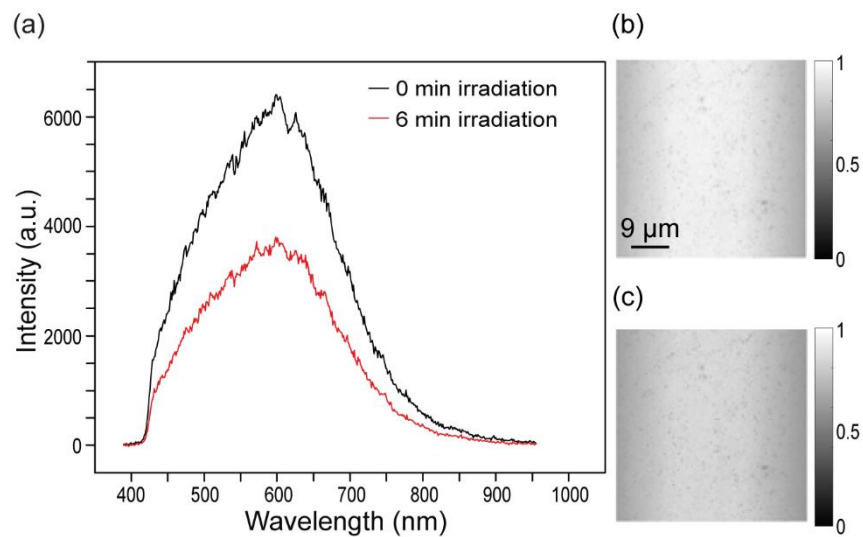

**Figure S7.** (a) Reflectance intensity recorded for uniform x-cut LN-Ag before and after 6 minutes of UV irradiation. Normalized hyperspectral images (b) before and (c) after 6 minutes of UV irradiation.

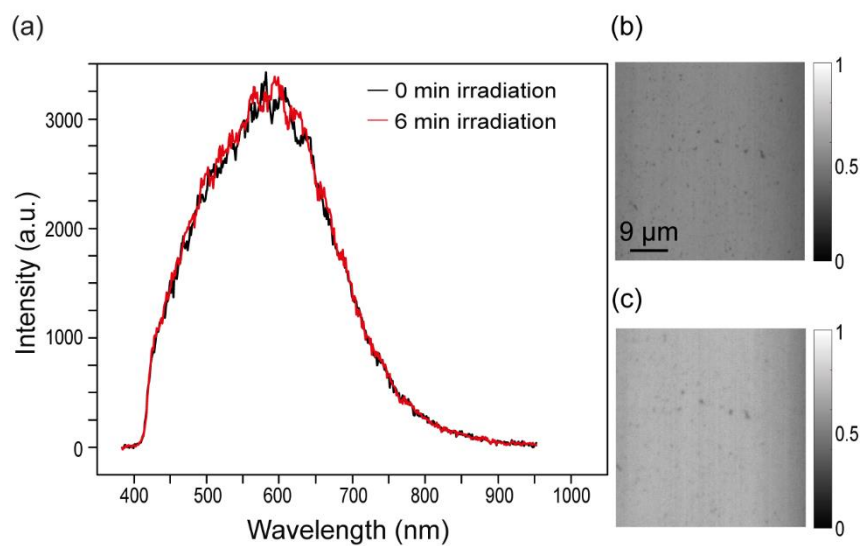

**Figure S8.** (a) Reflectance intensity recorded for  $-z$  PPELN before and after 6 minutes of UV irradiation. Normalized hyperspectral images (b) before and (c) after 6 minutes of UV irradiation.
